# Supplementary material for: Breed-Dependent Transcriptional Regulation of 5′-Untranslated GR (NR3C1) Exon 1 mRNA Variants in the Liver of Newborn Piglets
Source: PLoS One. 2012 Jul 5;7(7):e40432. doi: 10.1371/journal.pone.0040432 (PMC3390360; doi:10.1371/journal.pone.0040432)
Supplement: Table S1 — Raw data from MassArray analysis of CpG islands of promoter of GR. (XLS) [file pone.0040432.s001.xls]

## Sheet: raw methylation data
group	CpG4.5	CpG6	CpG7.8	CpG9	CpG10.11	CpG12	CpG13.14.15	CpG16.17	CpG18	CpG19	CpG52	CpG59	CpG63.64.65.66	CpG70	CpG76	CpG77	CpG80	CpG81	CpG82.83	CpG85	CpG86.87	CpG88	CpG94	CpG95.96	CpG98	CpG153	CpG154	CpG155	CpG156.157	CpG158.159	CpG160.161	CpG162	CpG169	CpG170.171.172.173.174	CpG238	CpG239.240.241	CpG242	CpG243.244.245.246	CpG248.249.250.251	CpG252.253.254	CpG258	CpG259	CpG260	CpG264.265	CpG266.267	CpG268.269.270	CpG271.272.273.274	CpG299	CpG301.302.303
LW	0.06	0.06	0.06	0.27	0.04	0.14	0.08	0.14	0.08	0.03	0.82	0.07	0.16	0.07	0.06	0.18	0	0.05	0.01	0.11	0.19	0.06	0.72	0.23	0.04	0	0.06	0.06	0.17	0	0.19	0.05	0.01	0.15	0.95	0.12	0.06	0.14	0.27	0.12	0	0.17	0.23	0.16	0.11	0.04	0.23	0.05	0.05
LW	0.03	0.03	0.04	0.11	0.01	0.13	0.03	0.08	0.05	0.07	0.98	0	0.33	0	0.18	0.17	0	0	0.38	0.06	0.18	0.07	0.44	0.19	0.03	0	0.06	0.05	0.16	0	0.14	0.05	0.01	0.15	0.96	0.19	0.05	0.04	0.47	0.19	0.03	0.13	0.21	0.13	0.95	0.08	0.21	0.04	0.04
LW	0.03	0.03	0.04	0.13	0.05	0.1	0.04	0.08	0.05	0.01	0.86	0.05	0.17	0.05	0.09	0.17	0	0.04	0.07	0.08	0.15	0.08	0.72	0.25	0.07	0.02	0.07	0.03	0.12	0.02	0.06	0.04	0.02	0.12	0.97	0.12	0.06	0.09	0.21	0.12	0	0.15	0.18	0.08	0.24	0.06	0.18	0.04	0.04
LW	0.06	0.06	0.04	0.2	0	0.14	0.08	0.11	0.08	0.02	0.92	0.05	0.22	0.05	0.07	0.11	0	0	0.4	0.19	0.41	0.21	na	na	na	0	0.05	0.09	0.17	0	0.53	0.03	0.03	0.17	0.95	0.12	0.07	0.13	0.16	0.12	0	0.12	0.16	0.09	0.15	0.06	0.16	0.05	0.05
LW	0.05	0.05	0.05	0.2	0.04	0.14	0.06	0.13	0.07	0.01	0.96	0.13	0.08	0.13	0.12	0.72	0	0	0.7	0.11	0.23	0.1	0.95	0.85	0	0	0.06	na	0.11	0.01	0.14	0.05	0.02	0.11	0.94	0.15	0.11	0.12	0.18	0.15	0	0.16	0.21	0.13	0.29	0.09	0.21	0.04	0.04
LW	0.05	0.05	0.04	0.19	0.02	0.1	0.05	0.12	0.07	0.02	0.89	0.02	0.95	0.02	0.11	0.16	0	0.03	0.14	0.09	0.14	0.07	0.67	0.24	0.18	0	0.01	0	0.11	0.06	0.63	0.03	0.01	0.18	0.96	0.1	0.04	0.05	0.13	0.1	0.01	0.14	0.18	0.08	0.15	0.11	0.18	0.06	0.06
EHL	0.05	0.05	0.05	0.19	0.03	0.16	0.06	0.12	0.05	0.02	0.96	0.01	0.19	0.01	0.06	0.15	0	0.01	0.2	0.04	0.17	0.09	0.94	0.48	0.55	0.03	0.08	0.1	0.15	0.01	0.21	0.06	0.07	0.07	0.93	0.1	0.07	0.09	0.23	0.1	0.01	0.15	0.35	0.1	0.19	0.03	0.35	0.05	0.05
EHL	0.05	0.05	0.05	0.19	0.02	0.11	0.1	0.08	0.09	0.04	0.91	0.03	0.18	0.03	0.04	0.15	0.01	0.09	0.09	0.06	0.14	0.08	0.76	0.29	0.03	0.03	0.01	0.08	0.12	0.12	0.37	0.06	0.01	0.15	0.96	0.1	0.13	0.02	0.24	0.1	0	0.18	0.2	0.1	0.22	0.04	0.2	0.04	0.04
EHL	0.06	0.06	0.03	0.18	0.03	0.09	0.06	0.1	0.07	0.02	0.86	0	0.2	0	0.03	0.18	0	0	0.3	0.34	0.22	0.12	0.7	0.31	0.1	0	0.02	0.03	0.2	0	0.21	0.07	0	0.14	0.94	0.14	0.19	0.12	0.16	0.14	0.04	0.07	0.24	0.1	0.06	0.06	0.24	0.05	0.05
EHL	0.05	0.05	0.03	0.24	0.01	0.11	0.05	0.12	0.07	0.01	0.77	0.01	0.14	0.01	0.02	0.23	0	0.01	0.57	0.18	0.2	0.15	0.91	0.84	0.13	0	0.06	0.02	0.16	0	0.15	0.04	0.01	0.09	0.92	0.09	0.03	0.15	0.26	0.09	0	0.16	0.21	0.09	0.04	0.02	0.21	0.05	0.05
EHL	0.07	0.07	0.07	0.25	0.01	0.22	0.09	0.18	0.11	0.02	0.91	0	0.28	0	0.07	0.18	0.04	0.02	0.02	0.21	0.16	0.1	0.97	0.75	0.11	0	0.06	0	0.18	0	0.12	0.08	0.01	0.17	0.95	0.14	0.09	0	0.32	0.14	0.01	0.12	0.21	0.09	0.7	0.03	0.21	0.07	0.07
EHL	0.07	0.07	0.04	0.16	0.02	0.12	0.09	0.11	0.11	0.01	0.98	0.02	0.29	0.02	0.1	0.16	0	0.01	0.18	0.06	0.15	0.07	na	0.35	0.01	0.09	0.05	0.08	0.28	0.02	0.29	0.11	0.02	0.23	0.96	0.15	0.01	0	0.13	0.15	0	0.21	0.32	0.18	0.39	0.09	0.32	0.06	0.06
Raw data from MassArray analysis of CpG islands of promoter of GR.
LW: Large white pig, EHL: Erhualian pig, na: not available
[truncated: 6 more columns]
